# Supplementary material for: Characterization of Avian Pathogenic Escherichia coli (APEC) Associated With Turkey Cellulitis in Iowa
Source: Front Vet Sci. 2020 Jul 3;7:380. doi: 10.3389/fvets.2020.00380 (PMC7350418; doi:10.3389/fvets.2020.00380)
Supplement: Supplementary Table 2 — Statistical analysis tables for isolates analyzed in this study. [file Table_2.xlsx]

## Sheet: Sheet1
	Litter A1 (93)	Litter B1(67)	Litter A2 (80)	Cellulitis (54)	Systemic (39)	Litter x Litter			Systemic x Cellulitis	Systemic x Litter			Cellulitis x Litter
Antimicrobial resitance	%	%	%	%	%	A1xA2	A1xB1	A2xB1		S x A1	S x A2	S x B1	C x A1	C x A2	C x B1
tetB	33.3333	73.1343	28.75	12.963	0	0.6218	****<0.0001	****<0.0001	*0.0389	****<0.0001	****<0.0001	****<0.0001	0.0104*	0.0359*	****<0.0001
tetA	8.60215	43.2836	43.75	16.6667	2.5641	****<0.0001	****<0.0001	>0.9999	*0.041	0.2802	****<0.0001	****<0.0001	0.1817	0.0013**	0.0029**
aph(3)IA	21.5054	11.9403	7.5	24.0741	0	0.0108*	0.1419	0.4073	**0.0014	0.0026**	0.1757	0.0492*	0.8378	0.0106*	0.0945
aac3VI	0	7.46269	6.25	5.55556	12.8205	0.0197*	0.0118*	>0.9999	0.2729	0.0019**	0.2929	0.4928	0.0478*	>0.9999	0.7306
blaTEM	22.5806	19.403	41.25	24.0741	0	0.009**	0.6977	0.007**	**0.0014	0.0011**	<0.0001****	0.0038**	0.8417	0.0436*	0.6569
drf17	6.45161	2.98507	5	5.55556	2.5641	0.7539	0.4698	0.6886	0.6368	0.4468	0.6667	>0.9999	>0.9999	>0.9999	0.6552
sulI	4.30108	16.4179	21.25	31.4815	35.8974	0.0008***	0.0128*	0.53	0.8239	****<0.0001	0.1189	0.0323*	****<0.0001	0.2255	0.0554
aadA	11.828	8.95522	15	16.6667	46.1538	0.6545	0.6133	0.3186	**0.0027	****<0.0001	0.0004***	****<0.0001	0.4585	0.8125	0.2688
qacEdelta1	5.37634	16.4179	17.5	25.9259	53.8462	0.0142*	0.0311*	>0.9999	**0.009	****<0.0001	****<0.0001	****<0.0001	0.0005***	0.2814	0.2595
Heavy metal resistance
terX	3.22581	16.4179	11.25	0	0	0.0679	0.0046**	0.4699	>0.9999	0.5547	0.0572	0.0065**	0.298	0.011*	0.0023**
terF	7.52688	16.4179	11.25	9.25926	0	0.4394	0.1262	0.4699	0.0719	0.104	0.0572	0.0065**	0.7597	0.7809	0.2903
terY3	5.37634	38.806	15	14.8148	0	0.0416*	****<0.0001	0.0013**	*0.019	0.321	0.0187*	****<0.0001	0.0706	>0.9999	0.0043**
terD	7.52688	47.7612	13.75	22.2222	0	0.2164	****<0.0001	****<0.0001	**0.0011	0.104	0.0154*	****<0.0001	0.0128*	0.2452	0.0044**
pcoA	31.1828	26.8657	51.25	40.7407	35.8974	0.0085**	0.6007	0.0039**	0.6716	0.6847	0.123	0.3829	0.2822	0.2902	0.1228
pcoE	20.4301	13.4328	50	25.9259	35.8974	****<0.0001	0.2957	****<0.0001	0.3621	0.0783	0.1725	0.0085**	0.539	0.0070**	0.104
pcoD	24.7312	32.8358	53.75	29.6296	56.4103	0.0001***	0.288	0.0128*	*0.0113	0.0006***	0.8459	0.0244*	0.5635	0.0077**	0.844
arsC	81.7204	47.7612	85	75.9259	71.7949	0.684	****<0.0001	****<0.0001	0.8106	0.2446	0.1361	0.0248*	0.5248	0.2581	0.0026**
silP	26.8817	52.2388	65	27.7778	30.7692	****<0.0001	0.0016**	0.1317	0.8188	0.6747	0.0008***	0.0427*	>0.9999	****<0.0001	0.0091**
Adhesion, invasion, serum resistance
papC	22.5806	16.4179	23.75	25.9259	15.3846	0.8587	0.424	0.3091	0.3076	0.479	0.3453	>0.9999	0.6902	0.8391	0.2595
papGII	17.2043	14.9254	11.25	16.6667	0	0.2874	0.8289	0.6232	**0.0092	0.0061**	0.0572	0.0125*	>0.9999	0.4414	0.8068
papG III	0	0	1.25	1.85185	0	0.4624	>0.9999	>0.9999	>0.9999	>0.9999	>0.9999	>0.9999	0.3673	>0.9999	0.4463
fimH	53.7634	77.6119	61.25	44.4444	25.641	0.357	0.0026**	0.0489*	0.0818	0.0039**	0.0004***	<0.0001****	0.3074	0.0767	0.0003***
sfaS	0	4.47761	0	0	10.2564	>0.9999	0.0715	0.0924	*0.0282	0.0068**	0.0104*	0.4189	>0.9999	>0.9999	0.2525
fliC (h7)	0	2.98507	8.75	3.7037	0	0.0039**	0.1738	0.1818	0.5077	>0.9999	0.0941	0.5305	0.1334	0.3124	>0.9999
Kps MTII	5.37634	2.98507	2.5	1.85185	0	0.453	0.7	>0.9999	>0.9999	0.321	0.5556	0.5305	0.4147	>0.9999	>0.9999
Kps MT K1	0	1.49254	5	7.40741	0	0.0439*	0.4188	0.3764	0.1365	>0.9999	0.3016	>0.9999	0.0169*	0.7138	0.1711
ibeA	6.45161	5.97015	7.5	7.40741	2.5641	>0.9999	>0.9999	0.7555	0.3947	0.4468	0.424	0.6497	>0.9999	>0.9999	>0.9999
traT	81.7204	53.7313	80	79.6296	82.0513	0.847	0.0002***	0.0008***	0.7978	>0.9999	0.8122	0.0059**	0.8285	>0.9999	0.0038**
iss	43.0108	35.8209	40	55.5556	66.6667	0.7577	0.4147	0.614	0.2938	0.0214*	0.0106*	0.0026**	0.1715	0.0813	0.0427*
KpsMTIII	9.67742	1.49254	0	0	0	0.0039**	0.046*	0.4558	>0.9999	0.0574	<0.0001****	>0.9999	0.0265*	>0.9999	>0.9999
papG 2/3	0	10.4478	1.25	0	0	0.4624	0.0019**	0.0236*	>0.9999	>0.9999	>0.9999	0.0453*	>0.9999	>0.9999	0.0166
papEF	2.15054	2.98507	0	0	0	0.4999	>0.9999	0.206	>0.9999	0.5805	>0.9999	0.5305	0.532	>0.9999	0.5017
ompTc	15.0538	7.46269	8.75	11.1111	7.69231	0.2474	0.215	>0.9999	0.7296	0.2775	>0.9999	>0.9999	0.621	0.7681	0.5374
Iron acquisition
iroN	12.9032	11.9403	27.5	7.40741	5.12821	0.0209*	>0.9999	0.0239*	0.7026	0.2302	0.0063**	0.3182	0.4132	0.0067**	0.5448
aerJ	26.8817	31.3433	21.25	31.4815	46.1538	0.4774	0.5969	0.1882	0.194	0.0417*	0.0062**	0.1472	0.5742	0.2255	>0.9999
ireA	8.60215	4.47761	3.75	18.5185	2.5641	0.2264	0.3612	>0.9999	* 0.0224	0.2802	>0.9999	>0.9999	0.1154	0.0066**	0.0176*
eitA	31.1828	32.8358	21.25	33.3333	41.0256	0.1684	0.8644	0.1349	0.5154	0.3167	0.03*	0.4095	0.8551	0.1602	>0.9999
eitB	31.1828	32.8358	21.25	33.3333	41.0256	0.1684	0.8644	0.1349	0.5154	0.3167	0.03*	0.4095	0.8551	0.1602	>0.9999
Miscellaneous
hlyF	52.6882	44.7761	25	27.7778	79.4872	0.0003***	0.3407	0.0145*	****<0.0001	0.0059**	<0.0001****	0.0005***	0.0036**	0.8414	0.061
intl1	7.52688	13.4328	16.25	24.0741	41.0256	0.0954	0.2868	0.652	0.1124	****<0.0001	0.0057**	0.0019**	0.0064**	0.2744	0.1582
ISEc12	9.67742	28.3582	7.5	3.7037	33.3333	0.7877	0.0029**	0.0009***	***0.0002	0.0017**	0.0006***	0.6628	0.2157	0.4738	0.0005***
groEL	10.7527	14.9254	13.75	9.25926	5.12821	0.6426	0.4734	>0.9999	0.6949	0.3518	0.2167	0.2032	0.7897	0.5889	0.414
colB	21.5054	25.3731	12.5	24.0741	28.2051	0.1585	0.5747	0.0551	0.8106	0.5	0.0429*	0.8207	0.8378	0.103	>0.9999
colM	5.37634	4.47761	17.5	25.9259	25.641	0.0142*	>0.9999	0.0184*	>0.9999	0.0018**	0.3349	0.0022**	0.0005***	0.2814	0.0011**
cvaC	26.8817	23.8806	1.25	3.7037	0	<0.0001****	0.7163	<0.0001****	0.5077	0.0005***	>0.9999	0.0012**	0.0007***	0.5648	0.0018**
etsA	60.2151	43.2836	46.25	61.1111	76.9231	0.0693	0.0381*	0.7418	0.1215	0.0744	0.0017**	0.0011**	>0.9999	0.1132	0.0674
etsB	60.2151	41.791	48.75	64.8148	76.9231	0.1678	0.0252*	0.4115	0.2557	0.0744	0.0053**	0.0006***	0.6021	0.078	0.0171*
	A2		A1				B1
	Case Barn	Case Barn	Control Barn	Control Barn	A2xA1		Control Barn	Control Barn	A2xB2
week	% positive for APEC	% Mortality	% positive for APEC	% Mortality	CaseXControl APEC A1		% positive for APEC	% Mortality	CaseXControl APEC B1
12	75	0.897	36	0.509	0.0391 *		50	0.188	0.2138
13	33	0.771	58	0.612	0.0361 *		33	0.217	>0.9999
14	42	0.841	41	0.824	0.6668		55	0.217	>0.9999
15	75	0.925	58	0.915	>0.9999		42	0.261	0.2138
16	75	1.262	70	0.745	>0.9999		55	0.203	0.4003
17	88	2.678	57	0.921	0.6186		36	0.275	0.0281 *
CaseXControl APEC				APEC A1 x B2 APEC like
	>0.9999			0.0174
mortality caseXmortality control				APEC A1 x B2 mortality
	0.0312 *			0.0312 *
